# Supplementary material
Source: PubMed Central journal article supplement (PMC4426967)
Supplement: NIHMS627462-supplement.pdf [file NIHMS627462-supplement.pdf]

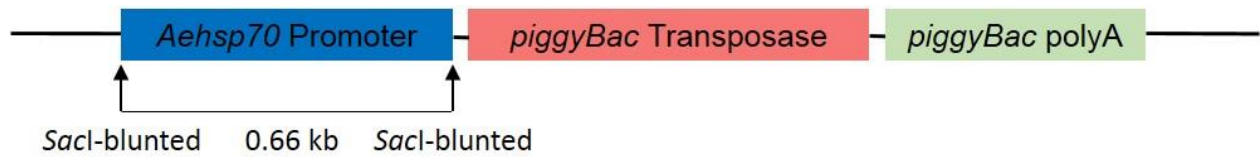

Figure S1. A schematic representation of the pAehsp-pBac helper plasmid. Schematic representation of the pAehsp-pBac helper construct. This helper consists of the 0.66-kb *Aehsp70* promoter upstream of the *piggyBac* transposase coding region and polyadenylation.

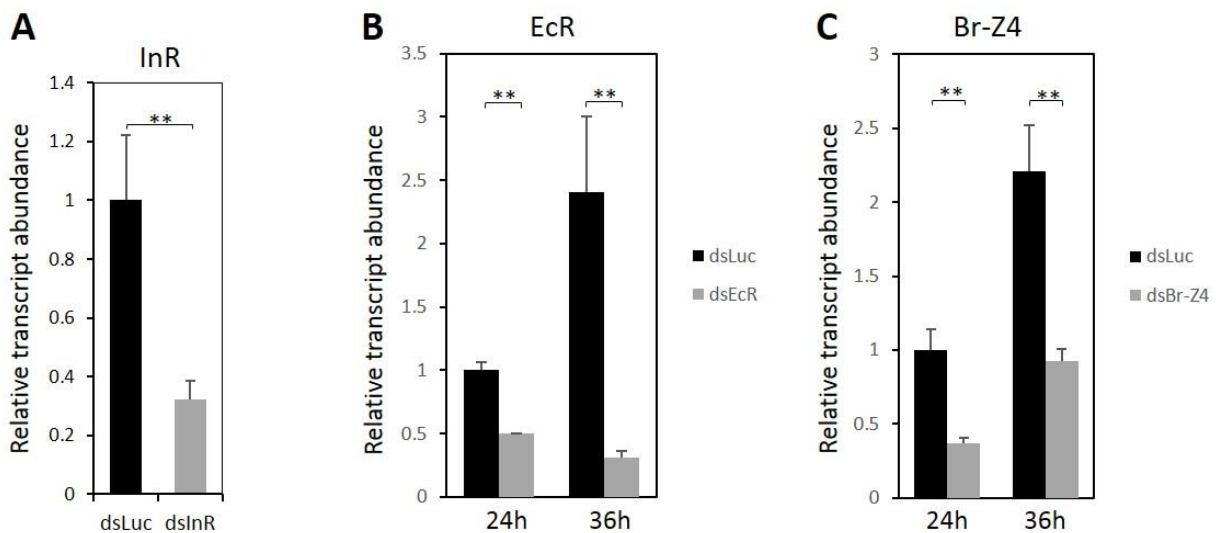

Figure S2. RNAi depletion of *InR*, *EcR* and *Br-Z4* genes. Transcript levels of *InR* (dsInR), *EcR* (dsEcR) and *Br-Z4* (dsBr-Z4) in the CP-Gal4>UAS-EGFP female mosquitoes after their respective dsRNA knockdown. Transcript levels of these genes were expressed relative to the Luciferase RNAi (dsLuc) control (standardized to 1). Times indicate hours after blood feeding.

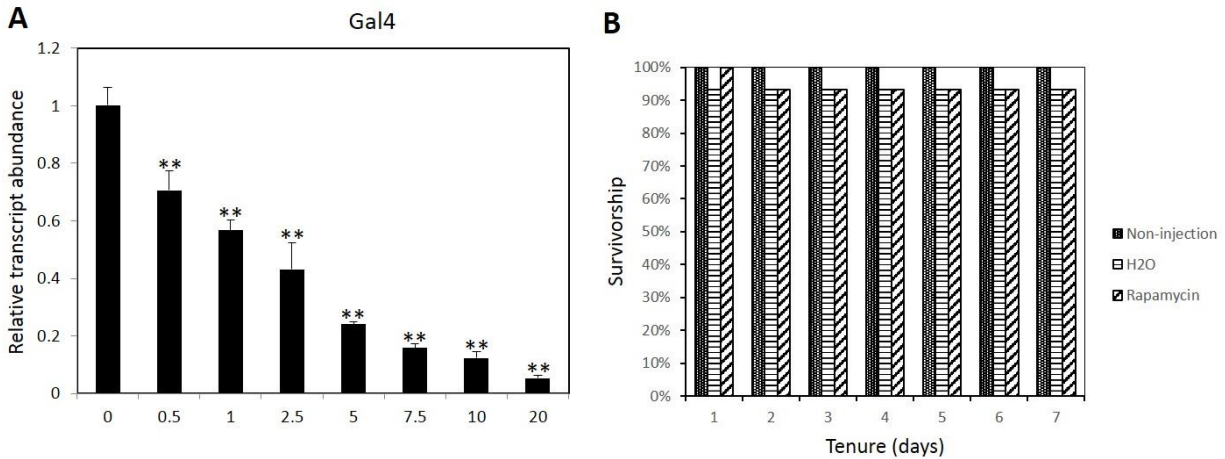

Figure S3. Effect of rapamycin on transgene expression and survival in the hybrid female mosquitoes. (A) A dose–response effect of the TOR inhibitor rapamycin on expression of the *CP-Gal4>UAS-EGFP* transgene. Three-day-old hybrid female mosquitoes were injected with rapamycin (0–20 pmol) and blood fed 1 day later. The transcript level of the *CP-Gal4>UAS-EGFP* transgene was measured in midguts 24 h PBM by means of qRT-PCR analysis using the Gal4 primer. The transcript level of control mosquitoes injected with dH<sub>2</sub>O was set at 1, while transcript levels for all other treatments were expressed relative to the control. Times designate injection amount (pmol). (B) Survivorship of female mosquitoes injected with 20 pmol of rapamycin. Non-injected mosquitoes served as a control. For each experimental set, the initial population size is 15 *CP-Gal4>UAS-EGFP* female mosquitoes. No difference was observed in survival between mosquitoes injected with H<sub>2</sub>O and those treated with rapamycin. Times indicate days after injection.

| No. of embryos injected | No. of G <sub>0</sub> survived to adulthood | No. of transgenic lines | Transformation efficiency |
|-------------------------|---------------------------------------------|-------------------------|---------------------------|
| 1084                    | 90                                          | 2                       | 2/90=2.2%                 |

Table S1. Transformation data from *Ae. aegypti* lines using *piggyBac* transposable elements as insertion vectors.

| Line  | Location                        | Sequence                                                              |
|-------|---------------------------------|-----------------------------------------------------------------------|
| M16-1 | 39 kb from 5' end of AAEL010518 | AATAACGTTATAAAAAAAAAACTTAA- <i>piggyBac</i> -<br>TTAAACTAAAGGCTCAACC  |
| F4-4  | 8 kb from 5' end of AAEL004671  | TGCAGTAACAGCTCTCTATTAA- <i>piggyBac</i> -<br>TTAAACTTTATGTGTATCAGATAC |

Table S2. Genomic integration sites in *Ae. aegypti* transgenic lines M16-1 and F4-4.

| Gene (PCR and RT-PCR)             | Sequence 5'-3'            |
|-----------------------------------|---------------------------|
| <u><i>Actin</i></u>               |                           |
| Forward                           | AAGGCCAACCGTGAGAAGATGACT  |
| Reverse                           | GCTCGTTGCCAATGGTGATGAC    |
| <u><i>CP</i></u>                  |                           |
| Forward                           | GGGATTTGCCTATGTTTCGGAGT   |
| Reverse                           | GCACCTCTGGCACGCTTCGA      |
| <u><i>CPT</i></u>                 |                           |
| Forward (CPT-F)                   | TGGATCCGCGAGCTTGAAG       |
| Reverse (CPT-R)                   | CGTTGCTACTGTTAGTGAAAGTGAA |
| <u><i>UAS-EGFP</i></u>            |                           |
| Forward (UAS)                     | CAAGAAGAGAACTCTGAATAGGG   |
| Reverse (158)                     | TGAAGTCGATGCCCTTCAGCT     |
| <u><i>piggyBac (Left Arm)</i></u> |                           |
| Forward (L1)                      | TGTCAATGCCGGTAAGTGTC      |

|                                       |                                  |
|---------------------------------------|----------------------------------|
| Reverse (L2)                          | CCTCTGTGGCAAGGTCAAGA             |
| <u><i>piggyBac</i> (Right Arm)</u>    |                                  |
| Forward (R1)                          | TGATGACCTGCAGTAGGAAGACG          |
| Reverse (R2)                          | AGAAACAACCTTTGGCACATATCA         |
| <u><i>Inverse PCR</i> (Left Arm)</u>  |                                  |
| 574F                                  | TCTTGACCTTGCCACAGAGG             |
| 157R                                  | TGACACTTACCGCATTGACA             |
| <u><i>Inverse PCR</i> (Right Arm)</u> |                                  |
| 2388F                                 | GTCAGTCCAGAAACAACCTTTGGC         |
| 2123R                                 | CCTCGATATACAGACCGATAAAAACACATG   |
| <u><i>Aahsp70</i></u>                 |                                  |
| Forward                               | CTCGAGTCCAGTCTTTTTGAAGTCGCGAA    |
| Reverse                               | AAGCTTCTTTAATTAGTGTTGTTTTGACGAGA |

| Gene (qRT-PCR) | Sequence 5'-3' |
|----------------|----------------|
|----------------|----------------|

---

*Actin*

|         |                         |
|---------|-------------------------|
| Forward | GACTACCTGATGAAGATCCTGAC |
| Reverse | GCACAGCTTCTCCTTAATGTCAC |

*CP*

|         |                          |
|---------|--------------------------|
| Forward | CTGGAGCAGTCGAGTGATAGTTTG |
| Reverse | CAATCTGACACGGACACCTTCG   |

*Gal4*

|         |                          |
|---------|--------------------------|
| Forward | TTCATCTTTCAGGAGGCTTGCT   |
| Reverse | GAACTATAAATGGCACCTGATTGC |

*EGFP*

|         |                      |
|---------|----------------------|
| Forward | CAGGGTGGTCACGAGGGTGG |
| Reverse | GTGCCCATCCTGGTCGAGCT |

*InR*

|         |                       |
|---------|-----------------------|
| Forward | GATAAACTGCGGGACATCGTG |
| Reverse | TGTCGGTGACGTCGATGGTA  |

*EcR*

|         |                        |
|---------|------------------------|
| Forward | AAGCGAGGTTATGATGTTGCG  |
| Reverse | CAGCAGGTCCTCTATCGTGTCC |

*Br-Z4*

Forward TTCACCACAAGGTATGAGCACAG  
Reverse GCAGTCAGCGGAAGCGGT

Gene (dsRNA) Sequence 5'-3'

---

*dsLuc*

Forward TAATACGACTCACTATAGGGCTCTGCCTCATAGAACTGCCTG  
Reverse TAATACGACTCACTATAGGGAACCTTCGCTTCAAAAATGGA

*dsInR*

Forward TAATACGACTCACTATAGGGGAGATCACCGAGTACCTGCTGC  
Reverse TAATACGACTCACTATAGGGGCAACAGACCCCGGTCTTG

*dsEcR*

Forward TAATACGACTCACTATAGGGAAGCGAGGTTATGATGTTGCGAATG  
Reverse TAATACGACTCACTATAGGGTGAGGACGAGGACTGGGTGCC

*dsBr-Z4*

Forward TAATACGACTCACTATAGGGATCGGATTTAAACCACTCCAGCG  
Reverse TAATACGACTCACTATAGGGTGCGCAGTCTTTGTTGAACATCTAT

Table S3. List of primers.
